# Supplementary material for: The dimeric and tetrameric octarepeat fragments of prion protein behave differently to its monomeric unit
Source: Royal Society of Chemistry journal article supplement (doi:10.1039/b402090a), 2004-01-01
Supplement: b402090a1.doc [file b402090a1.doc]

Supplementary materials legends:

Fig. a Distribution profiles of free and complexed fractions of Cu2+ ions in the presence of both Ac-PHGGGWGQ-NH2 (solid line) and Ac-(PHGGGWGQ)2-NH2 (dashed line) at 25˚C and *I* = 0.1 M KNO3. [Cu2+] = 1 * 10-3 M; ligand : metal : ligand ratio 2:1:1. The distribution of the bound metal ion between two ligands in all plots presented here was calculated using the stability constants obtained for binary Cu(II) complexes with both ligands.

Fig. b Distribution profiles of free and complexed fractions of Cu2+ ions in the presence of both Ac-PHGGGWGQ-NH2 (solid line) and Ac-(PHGGGWGQ)2-NH2 (dashed line) at 25˚C and *I* = 0.1 M KNO3. [Cu2+] = 1 * 10-3 M; ligand : metal : ligand ratio 2:2:1.

Fig. c Distribution profiles of free and complexed fractions of Cu2+ ions in the presence of both Ac-(PHGGGWGQ)2-NH2 (solid line) and Ac-(PHGGGWGQ)4-NH2 (dashed line) at 25˚C and *I* = 0.1 M KNO3. [Cu2+] = 1 * 10-3 M; ligand : metal : ligand ratio 2:1:1.

Fig. d Distribution profiles of free and complexed fractions of Cu2+ ions in the presence of both Ac-(PHGGGWGQ)2-NH2 (solid line) and Ac-(PHGGGWGQ)4-NH2 (dashed line) at 25˚C and *I* = 0.1 M KNO3. [Cu2+] = 2 * 10-3 M; ligand : metal : ligand ratio 2:2:1.

Fig. e Distribution profiles of free and complexed fractions of Cu2+ ions in the presence of both Ac-(PHGGGWGQ)2-NH2 (solid line) and Ac-(PHGGGWGQ)4-NH2 (dashed line) at 25˚C and *I* = 0.1 M KNO3. [Cu2+] = 4 * 10-3 M; ligand : metal : ligand ratio 2:4:1.
